# Supplementary material
Source: publisher figshare collection journal article supplement (https://sage.figshare.com/ndownloader/files/13058714)
Supplement: Supplementary file 1 [file 13058714]

Supplemental Table 1

*Correlations Between Study Variables (‘Cycle 1)*

|  | (1) | (2) | (3) | (4) | (5) | (6) | (7) | (8) | (9) | | (10) | | | (11) | | | |
| --- | --- | --- | --- | --- | --- | --- | --- | --- | --- | --- | --- | --- | --- | --- | --- | --- | --- |
| 1. Education | - |  |  |  |  |  |  |  |  | |  | | |  | | | |
| 2. Information Seeking (‘Lot of Effort’) | **-0.16*** | - |  |  |  |  |  |  |  | | |  | | |  | |
| 3. Information Seeking (‘Frustrated‘) | **-0.13*** | **0.73*** | - |  |  |  |  |  |  | | |  | | |  | |
| 4. Information Seeking (‘Too Hard to Understand‘) | **-0.16*** | **0.60*** | **0.64*** | - |  |  |  |  |  | | |  | | |  | |
| 5. Cancer Fatalism (‘Everything Causes Cancer‘) | **-0.14*** | **0.08*** | **0.09*** | **0.11*** | - |  |  |  |  | | |  | | |  | |
| 6. Cancer Fatalism (‘Prevent Not Possible‘) | **-0.16*** | **0.13*** | **0.12*** | **0.17*** | **0.31*** | - |  |  |  | | |  | | |  | |
| 7. Cancer Fatalism (‘Too Many Recommendations‘) | **-0.09*** | **0.14*** | **0.16*** | **0.16*** | **0.34*** | **0.40*** | - |  |  | | |  | | |  | |
| 8. Ethnicity (Non-White) | **-0.11*** | **0.07*** | 0.02 | **0.06*** | 0.00 | 0.03 | -0.03 | - |  | | |  | | |  | |
| 9. Gender | **-0.06*** | **-0.05*** | -0.02 | **-0.08*** | **0.11*** | 0.02 | -0.01 | **0.06*** | | - | | |  | | |  |
| 10. Age | **-0.10*** | **0.07*** | **0.05*** | 0.04 | **-0.16*** | -0.01 | -0.03 | **-0.13*** | | **-0.11*** | | | - | | |  |
| 11. Family History | -0.02 | -0.01 | 0.02 | -0.01 | **0.10*** | 0.02 | **0.06*** | **-0.11*** | | **0.07*** | | | 0.01 | | | - |

*Note.* **p*< 0.01

Supplemental Table 2

*Correlations Between Study Variables (Cycle 2)*

|  | (1) | (2) | (3) | (4) | (5) | (6) | (7) | (8) | (9) | | (10) | | | (11) | | |
| --- | --- | --- | --- | --- | --- | --- | --- | --- | --- | --- | --- | --- | --- | --- | --- | --- |
| 1. Education | - |  |  |  |  |  |  |  |  | |  | | |  | | |
| 2. Information Seeking (‘Lot of Effort‘) | **-0.11*** | - |  |  |  |  |  |  |  | | |  | | |
| 3. Information Seeking (‘Frustrated‘) | **-0.10*** | **0.74*** | - |  |  |  |  |  |  | | |  | | |
| 4. Information Seeking (‘Too Hard to Understand‘) | **-0.13*** | **0.56*** | **0.60*** | - |  |  |  |  |  | | |  | | |
| 5. Cancer Fatalism (‘Everything Causes Cancer‘) | **-0.14*** | 0.06 | **0.12*** | **0.14*** | - |  |  |  |  | | |  | | |
| 6. Cancer Fatalism (‘Prevent Not Possible‘) | **-0.16*** | 0.05 | **0.08*** | **0.11*** | **0.23*** | - |  |  |  | | |  | | |
| 7. Cancer Fatalism (‘Too Many Recommendations‘) | **-0.12*** | **0.11*** | **0.16*** | **0.19*** | **0.36*** | **0.34*** | - |  |  | | |  | | |
| 8. Ethnicity (Non-White) | **-0.10*** | 0.02 | -0.01 | -0.05 | 0.00 | 0.03 | -0.02 | - |  | | |  | | |
| 9. Gender | -0.03 | 0.02 | 0.02 | 0.01 | **0.12*** | 0.05 | 0.04 | 0.03 | | - | | |  | | |
| 10. Age | **-0.12*** | **0.10*** | **0.08*** | 0.06 | **-0.16*** | 0.01 | 0.01 | **-0.20*** | | **-0.14*** | | | - | | |
| 11. Family History | 0.06 | 0.02 | 0.01 | 0.02 | -0.06 | -0.01 | -0.03 | 0.07 | | -0.04 | | | -0.02 | | |

*Note.* **p*< 0.01

Supplemental Table 3

*Correlations Between Study Variables (Cycle 3)*

|  | (1) | (2) | (3) | (4) | (5) | (6) | (7) | (8) | (9) | | (10) | | | (11) | | | |
| --- | --- | --- | --- | --- | --- | --- | --- | --- | --- | --- | --- | --- | --- | --- | --- | --- | --- |
| 1. Education | - |  |  |  |  |  |  |  |  | |  | | |  | | | |
| 2. Information Seeking (‘Lot of Effort‘) | **-0.14*** | - |  |  |  |  |  |  |  | | |  | | |  | |
| 3. Information Seeking (‘Frustrated‘) | **-0.11*** | **0.73*** | - |  |  |  |  |  |  | | |  | | |  | |
| 4. Information Seeking (‘Too Hard to Understand‘) | **-0.17*** | **0.59*** | **0.63*** | - |  |  |  |  |  | | |  | | |  | |
| 5. Cancer Fatalism (‘Everything Causes Cancer‘) | **-0.10*** | **0.09*** | **0.07*** | **0.11*** | - |  |  |  |  | | |  | | |  | |
| 6. Cancer Fatalism (‘Prevent Not Possible‘) | **-0.18*** | **0.21*** | **0.19*** | **0.17*** | **0.31*** | - |  |  |  | | |  | | |  | |
| 7. Cancer Fatalism (‘Too Many Recommendations‘) | **-0.10*** | **0.14*** | **0.16*** | **0.14*** | **0.32*** | **0.39*** | - |  |  | | |  | | |  | |
| 8. Ethnicity (Non-White) | **-0.14*** | **0.11*** | 0.01 | **0.08*** | 0.02 | **0.12*** | -0.02 | - |  | | |  | | |  | |
| 9. Gender | 0.00 | -0.01 | 0.02 | -0.02 | **0.10*** | 0.03 | 0.03 | 0.05 | | - | | |  | | |  |
| 10. Age | **-0.14*** | 0.01 | 0.02 | 0.02 | **-0.15*** | -0.03 | 0.00 | **-0.14*** | | **-0.06*** | | | - | | |  |
| 11. Family History | 0.04 | -0.03 | 0.00 | -0.03 | **0.07*** | -0.05 | 0.02 | **-0.16*** | | **0.13*** | | | 0.04 | | | - |

*Note.* **p*< 0.01
